# Supplementary material
Source: PubMed Central journal article supplement (PMC3343227)
Supplement: NIHMS365355-supplement-1.pdf [file NIHMS365355-supplement-1.pdf]

## Supplement

### Structure of the $c_{10}$ Ring of the Yeast Mitochondrial ATP Synthase in the Open Conformation

Jindrich Symersky, Vijayakanth Pagadala, Daniel Osowski, Alexander Krah,  
Thomas Meier, José D. Faraldo-Gómez, and David M. Mueller

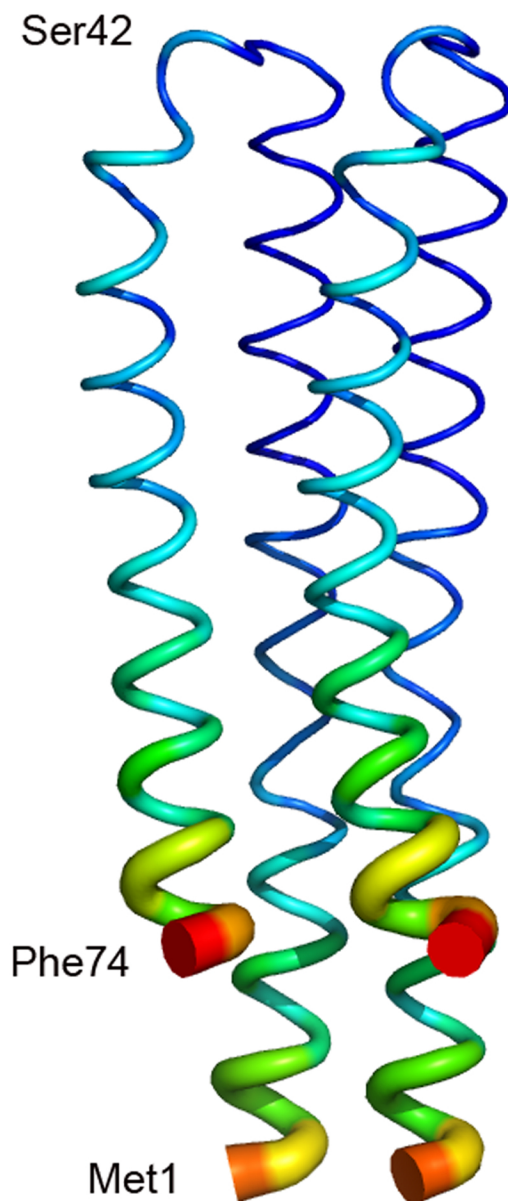

**Supplement Figure 1. Distribution of B-factors along the c-subunit structure.** B-factors for the main chain atoms are shown as a colored spectrum and mapped on a cartoon representation of the c-subunit, with blue representing the lowest B-factor and red the highest. In addition, the width of the cartoon is graduated with the lowest B-factor having the smallest diameter and that with the highest B-factor having the largest diameter. The B-factors is 18 for C of Ser 42 and 50 for  $C\alpha$  of Phe74 in chain K.

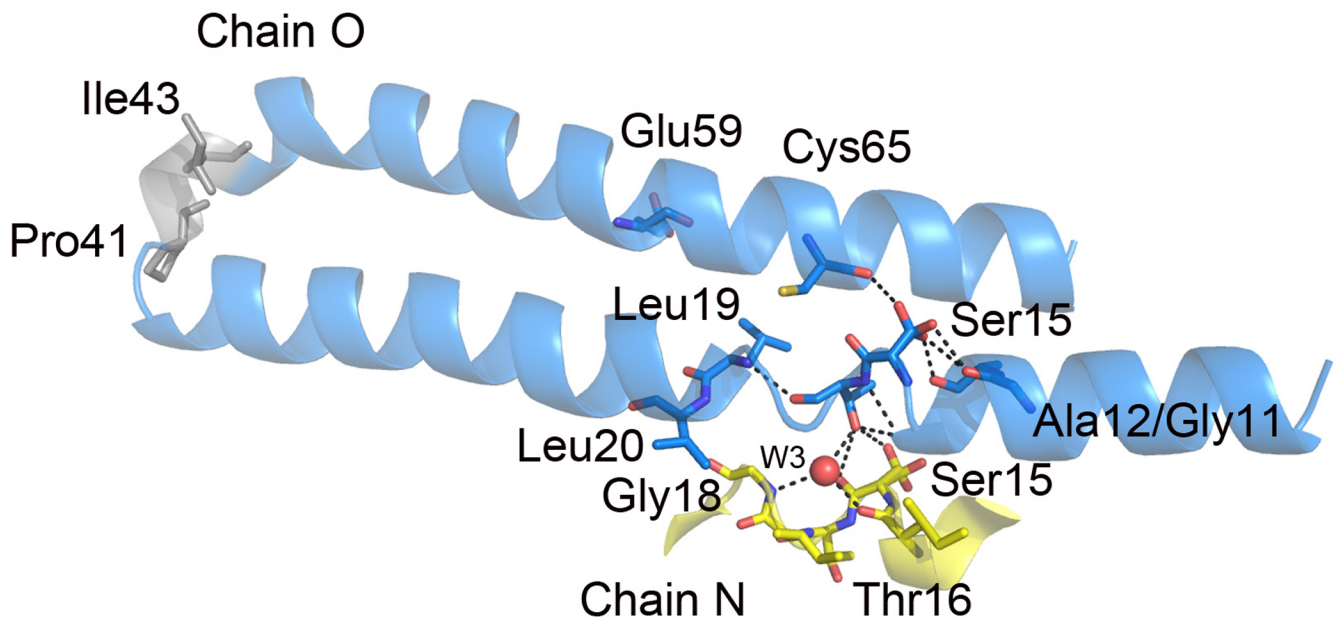

**Supplement Figure 2. Secondary structure of subunit c.** Subunit c consists of 4 helical fragments. The first helix extends from residues 3-14, is followed by a  $3_{10}$  helix within residues 15-18, and by a second helix from residues 19-39. These helices form the N-terminal transmembrane span. After a sharp turn, there is a second short  $3_{10}$  helix from residues 41-43, followed by the C-terminal helix from residues 44-73, which traverses the membrane. The H-bonded turn in the N-terminal span features H-bonding interactions to a water molecule associated with Thr16. This water molecule appears to bridge interactions between adjacent c-subunits (blue, yellow). Ser15 is shown in the three rotamer conformations revealed by the electron density.

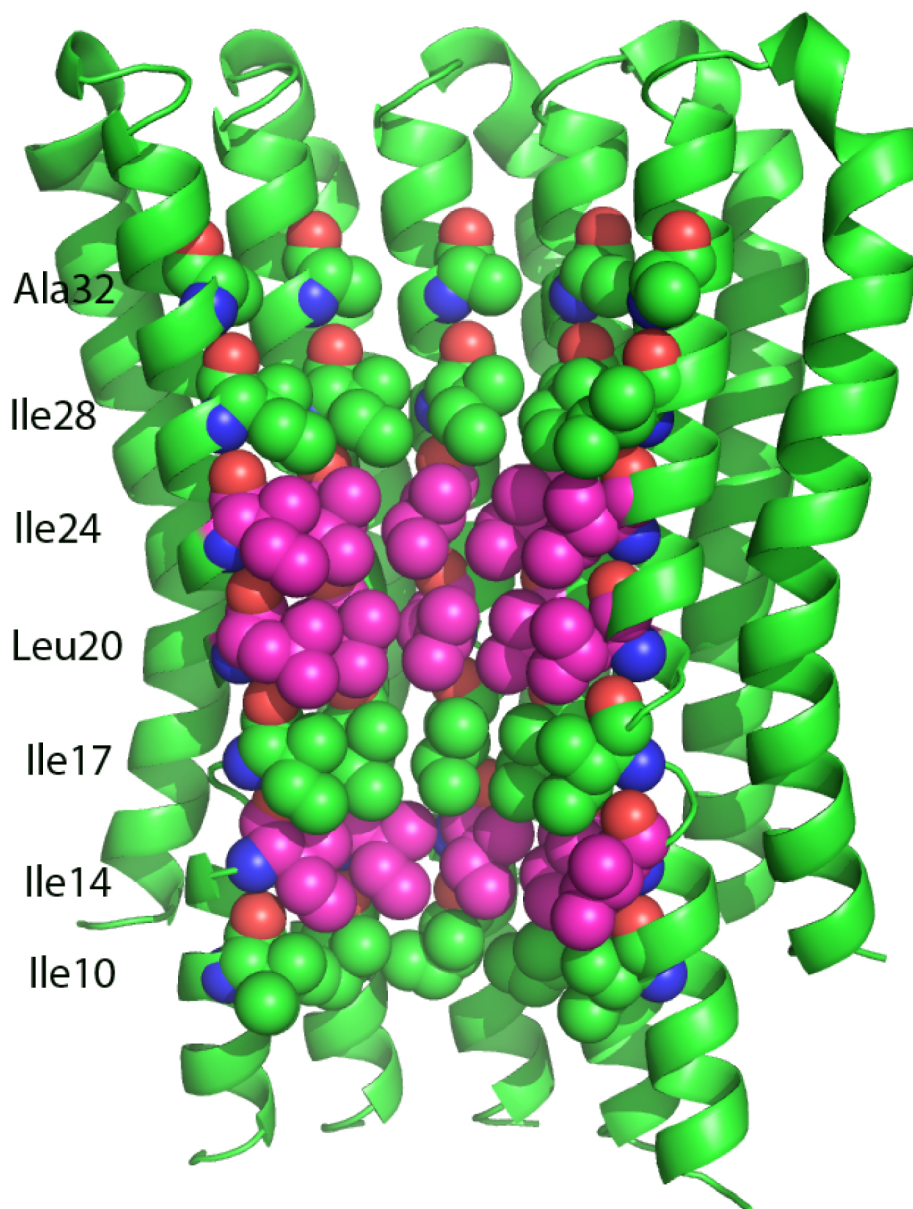

**Supplement Figure 3. Interhelical packing of the inner ring.** Cartoon representation of five c-subunits, highlighting residues in the inner face of the ring that form hydrophobic contacts. The residues colored in magenta (14, 20, 24) are conserved in the animal kingdom as Ala, and postulated to be required for forming a  $c_8$  ring<sup>1</sup>. Residues 10, 17, and 28 appear to be equally important in stabilizing this c-ring.

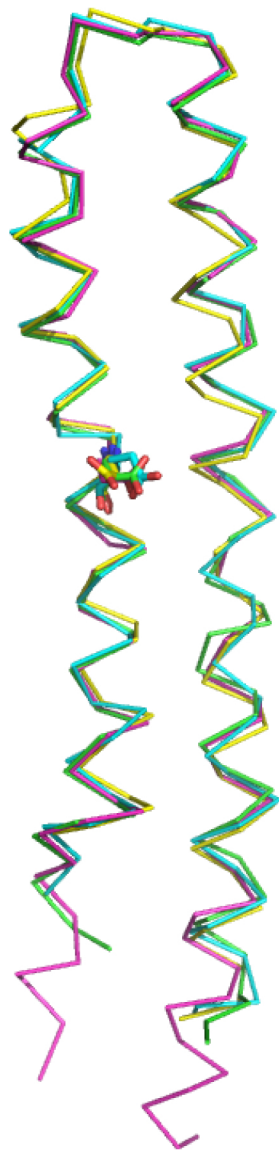

*Saccharomyces  
cerevisiae*

*Ilyobacter  
tartaricus*

*Spinach chloroplast*

*Spirulina platensis*

**Supplement Figure 4. Conformational differences between species of c-rings.** Shown is a comparison of the overall structure of the c-subunit from the  $c_{10}$  ring of yeast (yellow) with that of three other species, as indicated. The c-subunits were overlaid by fitting between the residues in the mitochondrial c-subunit with their equivalent in the other species.



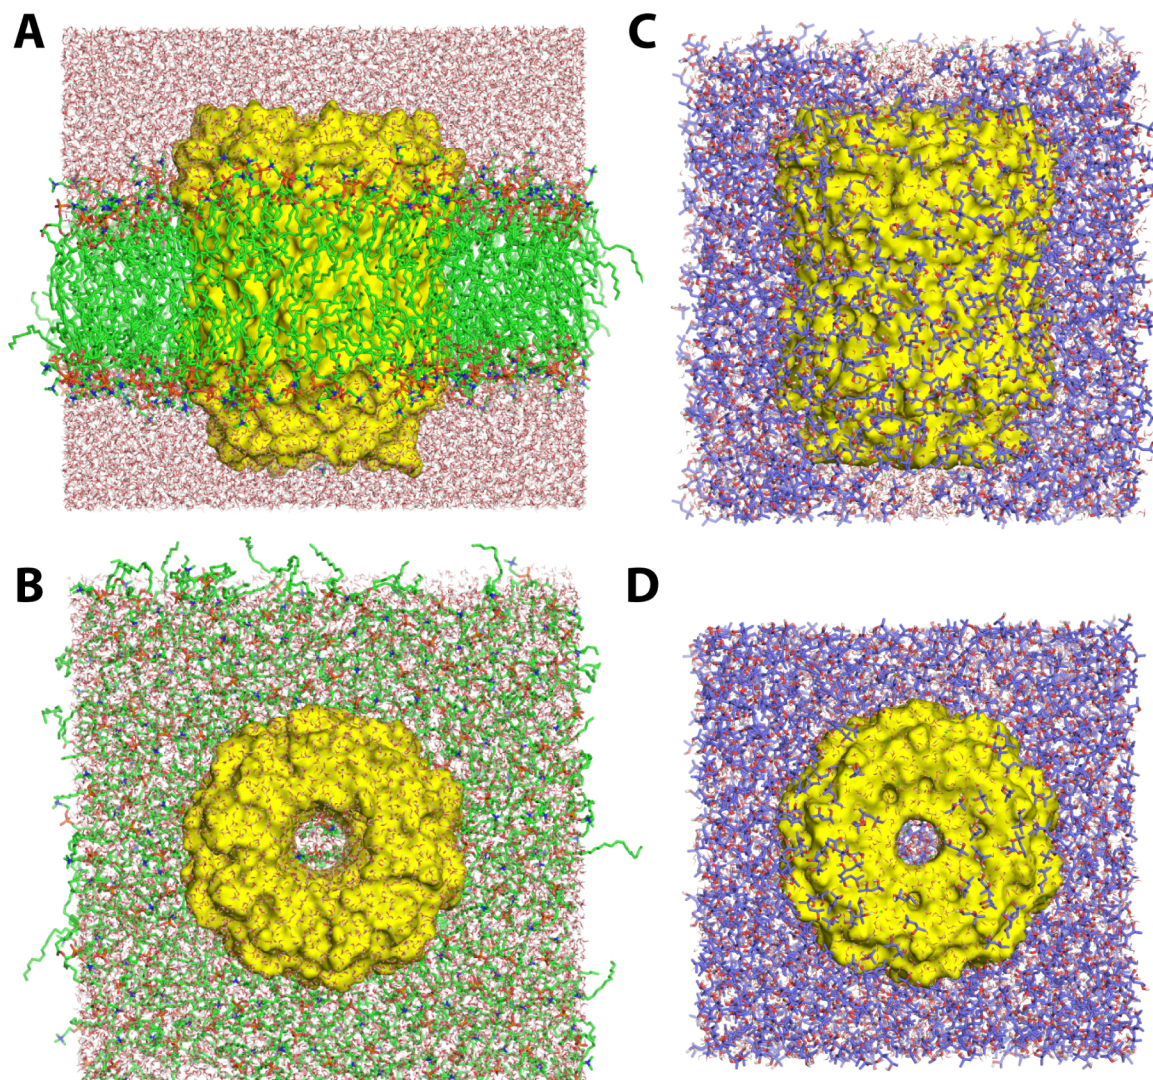

**Supplement Figure 5. Simulation systems.** **A, B:** The  $c_{10}$  ring (yellow surface) embedded in a model phospholipid membrane, viewed laterally and from the intermembrane space, respectively. The simulation box, whose approximate dimensions are  $100 \times 100 \times 92 \text{ \AA}$ , contains 239 lipids (green, blue, red sticks) and  $\sim 17,500$  water molecules, i.e.  $\sim 96,000$  atoms in total. **C, D:** Analogous views of the  $c_{10}$  ring, in a solution that mimics the crystallization buffer (70% MPD, 300mM NaCl). The simulation box is approx.  $84 \times 84 \times 81 \text{ \AA}$ , and contains 1,524 MPD molecules (purple, red sticks),  $\sim 4,700$  water molecules and 34 sodium and chloride ions (not shown), i.e.  $\sim 60,000$  atoms in total. Non-polar hydrogen atoms are omitted in all panels, for clarity. All simulations were carried out with NAMD<sup>2</sup>, using the CHARMM27/CMAP force field<sup>3,4</sup> using periodic-boundary conditions. Temperature and pressure were kept constant, at 298 K and 1 atm, respectively. In the lipid system, the surface area of the membrane was also constant ( $\sim 69 \text{ \AA}^2$  per lipid). Electrostatic interactions were computed with the Particle-Mesh-Ewald algorithm. A cut-off of  $12 \text{ \AA}$  was used for van der Waals interactions.

1. Watt, I.N., Montgomery, M.G., Runswick, M.J., Leslie, A.G. & Walker, J.E. Bioenergetic cost of making an adenosine triphosphate molecule in animal mitochondria. *Proc Natl Acad Sci U S A* **107**, 16823-7 (2010).
2. Phillips, J.C. et al. Scalable molecular dynamics with NAMD. *J Comput Chem* **26**, 1781-802 (2005).
3. Mackerell, A.D., Jr., Feig, M. & Brooks, C.L., 3rd. Extending the treatment of backbone energetics in protein force fields: limitations of gas-phase quantum mechanics in reproducing protein conformational distributions in molecular dynamics simulations. *J Comput Chem* **25**, 1400-15 (2004).
4. MacKerell, A.D. et al. All-atom empirical potential for molecular modeling and dynamics studies of proteins. *J. Phys. Chem. B* **102**, 3586-3616 (1998).
